# Supplementary material for: Experimental and theoretical approaches for the selective detection of thymine in real samples using gold nanoparticles as a biochemical sensor
Source: Royal Society of Chemistry journal article supplement (doi:10.1039/c8ra02627k), 2018-01-01
Supplement: c8ra02627k1.pdf [file c8ra02627k1.pdf]

**Electronic Supplementary Information:**

**Experimental and theoretical approach for selective detection of thymine in  
real samples using gold nanoparticles as a biochemical sensor**

**Kamlesh Shrivastava<sup>1,2\*</sup>, Nidhi Nirmalkar<sup>2</sup>, Santosh Singh Thakur<sup>2</sup>, Ramsingh Kurrey<sup>3</sup>, Deepak  
Sinha<sup>4</sup> and Ravi Shankar<sup>5</sup>**

**<sup>1</sup>School of Studies in Chemistry, Pt. Ravishankar Shukla University, Raipur, CG-492010,  
India**

**<sup>2</sup>Department of Chemistry, Guru Ghasidas Vishwavidyalaya, Koni, Bilaspur, CG**

**<sup>3</sup>School of Studies in Chemistry, Pt. Ravishankar Shukla University, Raipur-492010,  
Chhattisgarh, India**

**<sup>4</sup>Department of Chemistry, Government Nagarjuna Post Graduate College of Science,  
Raipur, CG-492010, India**

**<sup>5</sup>Nanoscience and Nanoengineering Program, South Dakota School of Mines and  
Technology, Rapid City, South Dakota-57701, USA**

**\*Corresponding author: Email:kshrivas@gmail.com**

**Phone: +91-7752-260488**

|                                                                                     |                                                                                      |
|-------------------------------------------------------------------------------------|--------------------------------------------------------------------------------------|
| 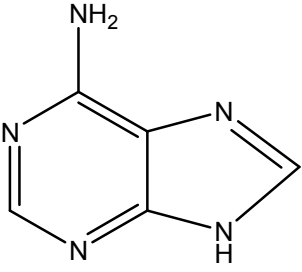   |   |
| Adenine                                                                             | Guanine                                                                              |
|    |   |
| Thymine                                                                             | Cytosine                                                                             |
|   |  |
| Glucose                                                                             | Urea                                                                                 |
|  |                                                                                      |
| Bilirubin                                                                           |                                                                                      |

**Fig. S1.** Structure of chemical substances

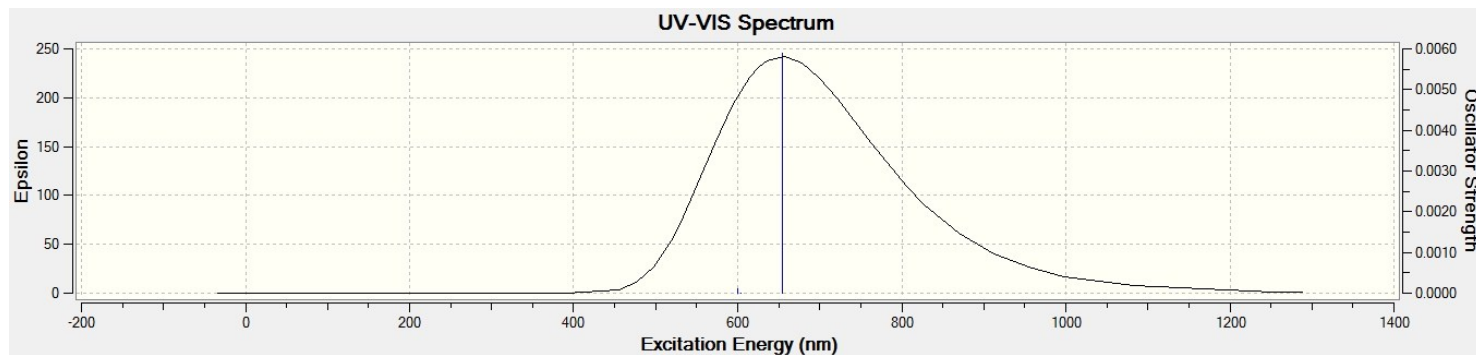

**Fig. S2** TD-DFT of AuNPs with thymine calculated using Polarizable Continuum Model (PCM) for the solvent water and integral equation formalism variant (IEFPCM) in self consistent field method (B3LYP method & LANL2DZ basis set).

| <b>Table S1.</b> Absorption band of AuNPs with thymine by TD-DFT calculation |       |                       |
|------------------------------------------------------------------------------|-------|-----------------------|
| Solvent                                                                      | Model | Absorption band in nm |
| Water                                                                        | PCM   | 654.8                 |
|                                                                              | CPCM  | 658.4                 |
|                                                                              | iCEM  | 661.04                |
|                                                                              | iPCM  | 661.06                |
|                                                                              | SMD   | 666.0                 |

**Table S2.** The Cartesian coordinates and bond parameters of thiamine gold interaction calculated by density functional theory (DFT) using B3LYP method and LANL2DZ basis set (E= -589.51873015 a.u.)

| Row | Symbol | Bond     | Angle    | Dihedral | X        | Y        | Z          |
|-----|--------|----------|----------|----------|----------|----------|------------|
| 1   | O      |          |          |          | -0.2302  | 1.176443 | 0.0005781  |
| 2   | O      | 4.654858 |          |          | -2.55221 | -2.85791 | -0.0001415 |
| 3   | N      | 2.319572 | 0.707818 |          | -1.41203 | -0.81948 | 0.0002931  |
| 4   | N      | 2.328603 | 60.80532 | 0.148403 | -3.74743 | -0.85945 | -0.0000096 |
| 5   | C      | 2.408127 | 62.00087 | 179.8409 | -2.63579 | 1.287011 | -0.0000008 |
| 6   | C      | 1.26869  | 31.35862 | 179.8443 | -1.35028 | 0.580621 | 0.0003476  |
| 7   | C      | 1.367187 | 143.7642 | 0.007657 | -3.77449 | 0.530339 | -0.000118  |
| 8   | C      | 1.507528 | 92.28868 | -179.993 | -2.62676 | 2.794512 | -0.0002687 |
| 9   | C      | 1.246759 | 30.59026 | -0.00616 | -2.56673 | -1.61123 | 0.000032   |
| 10  | H      | 1.084678 | 121.8056 | 179.9927 | -4.7608  | 0.981702 | -0.0003159 |
| 11  | H      | 1.022444 | 88.51574 | 179.9821 | -0.51905 | -1.31745 | 0.0001284  |
| 12  | H      | 1.013883 | 88.65639 | 179.9986 | -4.60512 | -1.40011 | -0.0001825 |
| 13  | H      | 1.096747 | 110.7858 | 59.07446 | -2.09728 | 3.180402 | -0.8798087 |
| 14  | H      | 1.096736 | 110.7874 | -59.035  | -2.0971  | 3.180737 | 0.8789981  |
| 15  | H      | 1.095781 | 111.1987 | -179.981 | -3.64601 | 3.196859 | -0.0002401 |
| 16  | Au     | 2.499972 | 122.5588 | 0.027298 | 1.947153 | -0.05197 | -0.0000508 |

**Table S3.** The Cartesian coordinates and bond parameters of adenine calculated by density functional theory (DFT) using B3LYP method and 6-31+G(d) basis set (E= -467.25962349 a.u.)

| Row | Symbol | Bond      | Angle       | Dihedral | X         | Y         | Z         |
|-----|--------|-----------|-------------|----------|-----------|-----------|-----------|
| 1   | N      |           |             |          | 2.034903  | -0.361843 | 0.035194  |
| 2   | C      | 1.4946354 |             |          | 1.489325  | -1.753185 | 0.014049  |
| 3   | N      | 1.3109426 | 121.5565605 |          | 0.199221  | -1.983825 | -0.017688 |
| 4   | C      | 1.4621031 | 118.2172519 | -0.1194  | -0.707943 | -0.837239 | -0.029505 |
| 5   | C      | 1.3127704 | 121.2836677 | 4.72112  | -0.252281 | 0.39181   | -0.101456 |
| 6   | C      | 1.3016895 | 120.9697972 | -2.5903  | 1.242883  | 0.669243  | -0.027746 |
| 7   | N      | 1.4700004 | 121.4487981 | -178.82  | 1.769523  | 2.041656  | -0.033591 |
| 8   | N      | 1.4681389 | 128.8772251 | -173.93  | -2.173409 | -0.820744 | 0.057496  |
| 9   | N      | 1.4600779 | 109.834637  | 173.719  | -1.365637 | 1.325276  | -0.246049 |
| 10  | C      | 1.3113039 | 105.3678617 | 175.054  | -2.503966 | 0.446977  | 0.113473  |
| 11  | H      | 1.0700002 | 119.2218531 | 177.534  | 2.167713  | -2.580542 | 0.027105  |
| 12  | H      | 0.9999992 | 109.4712018 | -150.14  | 1.103514  | 2.656062  | 0.389417  |
| 13  | H      | 0.9999996 | 109.4711683 | -30.142  | 2.625789  | 2.072309  | 0.482033  |
| 14  | H      | 1.0000004 | 113.6566051 | 136.316  | -1.283787 | 2.13954   | 0.328647  |
| 15  | H      | 1.0699995 | 124.1629312 | -166.22  | -3.473557 | 0.803355  | 0.392376  |

**Table S4.** The Cartesian coordinates and bond parameters of cytosine calculated by density functional theory (DFT) using B3LYP method and 6-31+G(d) basis set (E= - 394.90515340 a.u.)

| Row | Symbol | Bond      | Angle       | Dihedral     | X          | Y          | Z         |
|-----|--------|-----------|-------------|--------------|------------|------------|-----------|
| 1   | C      |           |             |              | 0.9090589  | 1.273304   | -0.103144 |
| 2   | C      | 1.3549062 |             |              | -0.3644112 | 1.7348837  | -0.071697 |
| 3   | N      | 1.4754641 | 121.1234414 |              | -1.4852597 | 0.8550808  | 0.3112387 |
| 4   | C      | 1.474523  | 111.7667978 | -25.6054526  | -1.1819081 | -0.5634683 | 0.0468257 |
| 5   | N      | 1.4703638 | 121.1050844 | 27.6451234   | 0.202521   | -1.0586883 | 0.0559389 |
| 6   | C      | 1.2886386 | 120.2332021 | -13.6297026  | 1.1884938  | -0.2292437 | 0.0342916 |
| 7   | N      | 1.4700001 | 120.2439992 | 176.4022839  | 2.5712162  | -0.7202698 | 0.1230192 |
| 8   | O      | 1.2584001 | 119.4426058 | -152.8093413 | -2.1243565 | -1.3653125 | -0.182102 |
| 9   | H      | 1.0700001 | 119.9168927 | -170.2657495 | 1.7217696  | 1.9576758  | -0.22978  |
| 10  | H      | 1.0700001 | 119.4445721 | -170.4496428 | -0.5596934 | 2.7570487  | -0.320582 |
| 11  | H      | 1.0000001 | 108.9448146 | -146.2882053 | -2.29755   | 1.119091   | -0.208841 |
| 12  | H      | 1.0000001 | 109.4712208 | 29.6018724   | 2.6262138  | -1.6354544 | -0.276246 |
| 13  | H      | 1.0000001 | 109.4712211 | 149.6018722  | 3.1773692  | -0.1015741 | -0.376775 |

**Table S5.** The Cartesian coordinates and bond parameters of glucose calculated by density functional theory (DFT) using B3LYP method and 6-31+G(d) basis set (E= -687.16520376 a.u.)

| Row | Symbol | Bond      | Angle       | Dihedral    | X          | Y          | Z          |
|-----|--------|-----------|-------------|-------------|------------|------------|------------|
| 1   | C      |           |             |             | 1.1862307  | -1.4220962 | -0.2097575 |
| 2   | C      | 1.5403513 |             |             | 1.6949879  | -0.0048566 | -0.5342262 |
| 3   | C      | 1.5307537 | 108.6551133 |             | 0.8172782  | 1.0108274  | 0.2014494  |
| 4   | C      | 1.53076   | 108.0443539 | -58.5559624 | -0.6289619 | 0.8079418  | -0.2573024 |
| 5   | C      | 1.540368  | 108.6556407 | 58.5630905  | -1.0467426 | -0.6411045 | 0.0564776  |
| 6   | O      | 1.4394424 | 109.8976168 | 59.8172041  | -0.181924  | -1.5607941 | -0.6350926 |
| 7   | O      | 1.4300001 | 109.8915495 | 179.9219418 | 3.0535965  | 0.1333691  | -0.1099898 |
| 8   | O      | 1.4300001 | 110.096523  | -178.821989 | 1.2465463  | 2.3410308  | -0.1005244 |
| 9   | O      | 1.4300001 | 109.7573849 | 178.7495729 | -1.4871062 | 1.7215804  | 0.430995   |
| 10  | C      | 1.5400001 | 109.2443197 | -179.790067 | -2.4993724 | -0.8617466 | -0.4048077 |
| 11  | O      | 1.4300001 | 109.4712206 | -59.8614038 | -3.361472  | 0.0482132  | 0.2834203  |
| 12  | O      | 1.4300001 | 109.3451374 | 58.3608711  | 1.2690734  | -1.6465694 | 1.2000826  |
| 13  | H      | 0.9600001 | 109.4712208 | 60.2701427  | 3.5994288  | -0.50835   | -0.5702765 |
| 14  | H      | 0.9600001 | 109.4712209 | -60.4907417 | 2.1562613  | 2.4559956  | 0.1837324  |
| 15  | H      | 0.9600001 | 109.4712204 | -180        | -4.2670075 | -0.08933   | -0.0041342 |
| 16  | H      | 0.9600001 | 109.4712207 | -179.703272 | -2.3932853 | 1.587705   | 0.1437374  |
| 17  | H      | 0.9600001 | 109.4712207 | 179.7938387 | 2.1814347  | -1.5576677 | 1.4852027  |
| 18  | H      | 1.0700001 | 109.5328882 | -119.812996 | 1.7914555  | -2.1402002 | -0.7225244 |
| 19  | H      | 1.0700001 | 109.5208602 | 179.9672018 | 1.6340324  | 0.1641313  | -1.5890379 |
| 20  | H      | 1.0700001 | 109.6657325 | 60.9340895  | 0.8863536  | 0.8487739  | 1.2568486  |
| 21  | H      | 1.0700001 | 109.6528356 | -61.1121667 | -0.6998144 | 0.9803002  | -1.3109497 |
| 22  | H      | 1.0700001 | 109.455967  | 60.2796646  | -0.9761196 | -0.8121149 | 1.11036    |
| 23  | H      | 1.0700001 | 109.4712209 | 60.1385963  | -2.5687587 | -0.6908303 | -1.4587874 |
| 24  | H      | 1.0700001 | 109.4712204 | -179.861403 | -2.7942131 | -1.8668452 | -0.1862991 |

**Table S6.** The Cartesian coordinates and bond parameters of guanine calculated by density functional theory (DFT) using B3LYP method and 6-31+G(d) basis set (E= -542.49883324 a.u.)

| Row | Symbol | Bond      | Angle       | Dihedral    | X          | Y          | Z          |
|-----|--------|-----------|-------------|-------------|------------|------------|------------|
| 1   | N      |           |             |             | 1.6250048  | 0.9479212  | -0.3121434 |
| 2   | C      | 1.4972051 |             |             | 1.7959029  | -0.5136213 | -0.0358995 |
| 3   | N      | 1.3145754 | 123.2243588 |             | 0.8039772  | -1.375292  | -0.07732   |
| 4   | C      | 1.4622908 | 119.8911515 | -14.9739119 | -0.5777038 | -0.8964899 | -0.0779564 |
| 5   | C      | 1.3096361 | 121.6417609 | 3.0186373   | -0.8618443 | 0.3818128  | -0.0967453 |
| 6   | C      | 1.4786286 | 112.514342  | 25.2306229  | 0.2478693  | 1.4168759  | -0.047716  |
|     | N      | 1.4700001 | 118.3841676 | -           | 3.1401024  | -1.0104148 | 0.2915515  |
|     |        |           |             | 155.0656082 |            |            |            |
| 8   | O      | 1.2584001 | 121.3282922 | 157.0958538 | 0.0039601  | 2.6276232  | 0.1934684  |
| 9   | N      | 1.460506  | 110.0309657 | 177.2851004 | -2.3086595 | 0.571849   | -0.1574911 |
| 10  | N      | 1.4682435 | 128.4611174 | -           | -1.8163451 | -1.6817095 | -0.0076949 |
|     |        |           |             | 174.4079645 |            |            |            |
| 11  | C      | 1.3110863 | 105.3189134 | 171.8116634 | -2.7765925 | -0.8013974 | 0.1403684  |
| 12  | H      | 1.0000001 | 108.9027671 | 36.0489683  | 2.2593249  | 1.4653179  | 0.2622595  |
| 13  | H      | 1.0000001 | 109.471221  | -           | 3.2312931  | -1.9559565 | -0.0209152 |
|     |        |           |             | 149.8591561 |            |            |            |
| 14  | H      | 1.0000001 | 109.4712201 | -29.8591568 | 3.8255761  | -0.4415835 | -0.1629337 |
| 15  | H      | 1.0000001 | 113.6799471 | 134.6550099 | -2.6495515 | 1.2658829  | 0.4766301  |
| 16  | H      | 1.0700001 | 124.1777878 | -           | -3.7726713 | -1.0442049 | 0.44659    |
|     |        |           |             | 165.3547537 |            |            |            |



**Table S7.** The Cartesian coordinates and bond parameters of urea calculated by density functional theory (DFT) using B3LYP method and 6-31+G(d) basis set (E= -225.25786004 a.u.)

| Row | Symbol | Bond  | Angle | Dihedral | X | Y          | Z         |
|-----|--------|-------|-------|----------|---|------------|-----------|
| 1   | C      |       |       |          | 0 | 0          | 0.1300875 |
| 2   | N      | 1.47  |       |          | 0 | 1.2730575  | -0.604913 |
| 3   | N      | 1.47  | 120   |          | 0 | -1.2730575 | -0.604913 |
| 4   | O      | 1.258 | 120   | 180      | 0 | 0          | 1.3884876 |
| 5   | H      | 1     | 120   | 0        | 0 | 2.1390829  | -0.104913 |
| 6   | H      | 1     | 120   | 180      | 0 | 1.2730575  | -1.604913 |
| 7   | H      | 1     | 120   | 0        | 0 | -2.1390829 | -0.104913 |
| 8   | H      | 1     | 120   | -180     | 0 | -1.2730575 | -1.604913 |

**Table S8.** The Cartesian coordinates and bond parameters of bilirubin calculated by density functional theory (DFT) using B3LYP method and 6-31+G (d) basis set (E= -1949.58777280 a.u.)

| Row | Symbol | Bond      | Angle       | Dihedral     | X          | Y          | Z          |
|-----|--------|-----------|-------------|--------------|------------|------------|------------|
| 1   | O      |           |             |              | -6.9809395 | -0.8249639 | 0.6663834  |
| 2   | O      | 4.1051209 |             |              | -3.8796038 | -0.411106  | 3.3239117  |
| 3   | O      | 2.2692189 | 133.0000882 |              | -7.0851066 | -0.8395122 | -1.6003967 |
| 4   | O      | 2.2692892 | 62.9472978  | -91.7186173  | -4.4315261 | -2.5227345 | 2.7025579  |
| 5   | O      | 6.0308647 | 126.9347053 | 40.7997018   | 0.7841752  | 3.387607   | 2.8877089  |
| 6   | O      | 5.1615942 | 106.6665029 | -98.8447625  | 4.742632   | 0.6617888  | 1.0055321  |
| 7   | N      | 5.7112169 | 62.3307218  | -44.3456077  | -0.746813  | 0.517688   | -1.8067173 |
| 8   | N      | 3.3141314 | 103.7631056 | -79.7144987  | 0.6022729  | -2.4783832 | -1.3742919 |
| 9   | N      | 2.3454981 | 72.2747546  | -29.013468   | 0.0838475  | 2.8638083  | 0.7113502  |
| 10  | N      | 2.3450806 | 94.3339122  | 14.3180905   | 3.4080599  | -1.1429952 | 0.3265068  |
| 11  | C      | 2.4782027 | 48.0369655  | 128.7321136  | -1.702208  | -1.7649822 | -1.9416679 |
| 12  | C      | 1.3469148 | 122.7368114 | 6.8412079    | -1.8506302 | -0.2521726 | -1.86223   |
| 13  | C      | 1.370481  | 63.1508407  | 96.0261765   | -0.7102891 | -2.3319097 | -1.0083071 |
| 14  | C      | 1.3471437 | 111.0412638 | 69.9904016   | -2.9673451 | 0.5008707  | -1.8363503 |
| 15  | C      | 1.377446  | 107.8378884 | -127.9928369 | -0.8416896 | -2.7903461 | 0.2839496  |
| 16  | C      | 1.4168083 | 105.8788761 | 0.0134775    | -2.5266683 | 1.8451782  | -1.7589748 |
| 17  | C      | 1.416905  | 107.3729316 | 0.0173899    | 0.4370449  | -3.2274269 | 0.7098817  |
| 18  | C      | 1.3705779 | 63.9300611  | 102.0913002  | -1.1495639 | 1.8261814  | -1.7425251 |
| 19  | C      | 1.3569695 | 106.482811  | 0.0049415    | 1.2819926  | -3.0179079 | -0.3310464 |
| 20  | C      | 1.4775244 | 127.6743369 | 179.937367   | -4.3698177 | 0.0380596  | -1.8805637 |
| 21  | C      | 1.4774076 | 126.171992  | 179.9372339  | -2.087917  | -2.8177256 | 1.0769824  |
| 22  | C      | 1.4778964 | 126.2943215 | -179.9797307 | -3.3865545 | 3.0459751  | -1.7054918 |
| 23  | C      | 1.4778174 | 126.2855591 | -179.9772682 | 0.7708343  | -3.7980957 | 2.0315723  |
| 24  | C      | 1.542028  | 114.4856824 | 90.0852867   | -4.9961166 | -0.2364652 | -0.4984507 |
| 25  | C      | 1.5421043 | 114.4886546 | -89.9155263  | -2.3477996 | -1.542017  | 1.9034896  |
| 26  | C      | 1.4041904 | 117.9425584 | 61.7408592   | -0.1572855 | 2.8176724  | -1.6786512 |
| 27  | C      | 1.4334998 | 133.3228027 | 179.9217964  | 2.6840652  | -3.2478734 | -0.521388  |
| 28  | C      | 1.3545323 | 125.4926707 | -88.3369082  | 0.4081761  | 3.2923906  | -0.5430222 |
| 29  | C      | 1.3357854 | 124.6228933 | -88.2880141  | 3.6453875  | -2.3732903 | -0.2127032 |
| 30  | C      | 1.4486418 | 129.5418661 | -179.9982383 | 1.4301883  | 4.305265   | -0.3752733 |
| 31  | C      | 1.4547455 | 129.3941589 | 179.9962524  | 5.0874219  | -2.4962077 | -0.3600557 |
| 32  | C      | 1.222897  | 30.1777756  | 0.9727534    | -6.4443798 | -0.6702623 | -0.5726318 |
| 33  | C      | 1.2229654 | 30.1803068  | 109.7997443  | -3.6502624 | -1.5822915 | 2.6735986  |
| 34  | C      | 1.3506336 | 109.1317772 | 179.9877577  | 5.6757314  | -1.3638725 | 0.0825727  |
| 35  | C      | 1.3470446 | 110.0847371 | -179.9983404 | 1.7045798  | 4.4733707  | 0.9327706  |
| 36  | C      | 1.2186439 | 99.6361889  | -25.9685441  | 0.82215    | 3.5258777  | 1.6775304  |
| 37  | C      | 1.2184335 | 121.5769446 | 11.7762025   | 4.5857143  | -0.4538536 | 0.5415289  |

|    |   |           |             |              |            |            |            |
|----|---|-----------|-------------|--------------|------------|------------|------------|
| 38 | C | 1.4924044 | 121.8098535 | 0.0003938    | 2.0372778  | 5.010976   | -1.5417574 |
| 39 | C | 1.4404283 | 126.9348825 | -0.0411658   | 5.8105477  | -3.6250196 | -0.8870341 |
| 40 | C | 1.4852349 | 132.4637917 | 179.9801472  | 7.0965447  | -0.9400139 | 0.1695001  |
| 41 | C | 1.4276948 | 130.2436202 | -179.995564  | 2.6298428  | 5.3500981  | 1.575849   |
| 42 | C | 1.3332523 | 123.4149475 | 140.03132    | 6.8716159  | -3.5092229 | -1.6859628 |
| 43 | C | 1.3403412 | 123.8661581 | 40.0116173   | 2.8476786  | 6.6163797  | 1.1942821  |
| 44 | H | 1.0960952 | 131.7175799 | -153.0904684 | -2.6755127 | -2.2391419 | -1.7705678 |
| 45 | H | 1.0985438 | 85.4109154  | 100.3022706  | -1.4315605 | -2.0184481 | -2.9757392 |
| 46 | H | 1.0118228 | 85.0344201  | -124.3032843 | 0.2138203  | 0.2001832  | -1.8193522 |
| 47 | H | 1.0118218 | 79.0777057  | -124.8784022 | 0.9893439  | -2.2217668 | -2.2732399 |
| 48 | H | 1.0980365 | 109.4755245 | -147.5978492 | -4.9845761 | 0.7822428  | -2.4039636 |
| 49 | H | 1.0978664 | 110.0056418 | -33.1119411  | -4.4470644 | -0.8682034 | -2.495406  |
| 50 | H | 1.0971649 | 109.938529  | 33.2904398   | -2.9464408 | -2.9999533 | 0.4185748  |
| 51 | H | 1.0980518 | 109.6027784 | 147.7291349  | -2.07294   | -3.6796851 | 1.7570702  |
| 52 | H | 1.0946348 | 112.1170931 | 173.1126274  | -2.8091397 | 3.9587758  | -1.527693  |
| 53 | H | 1.094922  | 110.4064905 | -66.7504886  | -3.9263603 | 3.1713569  | -2.6498133 |
| 54 | H | 1.0949008 | 110.6940359 | 53.1593276   | -4.121305  | 2.9600693  | -0.8982932 |
| 55 | H | 1.0946373 | 112.1259649 | -174.8961185 | 1.8451557  | -3.9747431 | 2.1449749  |
| 56 | H | 1.0949556 | 110.4489905 | 65.0003277   | 0.2593611  | -4.7555556 | 2.1750767  |
| 57 | H | 1.0949155 | 110.6499085 | -54.9133298  | 0.4625456  | -3.1199181 | 2.8339894  |
| 58 | H | 1.0958077 | 109.8747733 | 56.9960169   | -4.9374548 | 0.6643789  | 0.1227041  |
| 59 | H | 1.0924317 | 109.0545246 | -62.3286177  | -4.4420524 | -1.0408926 | -0.009251  |
| 60 | H | 1.0955717 | 109.7759238 | 57.2546055   | -2.3687507 | -0.6693127 | 1.2415034  |
| 61 | H | 1.0961727 | 109.5163458 | -61.2595233  | -1.535242  | -1.4017529 | 2.6257574  |
| 62 | H | 1.0874951 | 115.8029672 | 92.2746708   | 0.1611964  | 3.2308057  | -2.6328712 |
| 63 | H | 1.0872973 | 115.7445821 | 91.8232176   | 2.9507504  | -4.2105901 | -0.9506561 |
| 64 | H | 1.0135377 | 100.5227    | -6.5029335   | -0.6095769 | 2.150856   | 0.9065947  |
| 65 | H | 1.0134683 | 100.539925  | 4.7617658    | 2.4854727  | -0.7820811 | 0.5402633  |
| 66 | H | 1.0956818 | 110.6060398 | -47.4041284  | 2.327179   | 4.2940553  | -2.3179666 |
| 67 | H | 1.0947956 | 110.5052905 | 72.5186134   | 1.3232704  | 5.7180998  | -1.9762072 |
| 68 | H | 1.0926354 | 113.0874355 | -165.8173832 | 2.9489413  | 5.5560855  | -1.2856768 |
| 69 | H | 1.0860768 | 117.3326576 | -38.39262    | 5.4448309  | -4.6151257 | -0.6310968 |
| 70 | H | 1.0941492 | 110.4945897 | 96.938032    | 7.3664128  | -0.3251212 | -0.6943521 |
| 71 | H | 1.0955361 | 110.4609552 | -143.6873117 | 7.2637938  | -0.344091  | 1.0734376  |
| 72 | H | 1.0932785 | 112.558351  | -25.2099864  | 7.784033   | -1.787765  | 0.2322366  |
| 73 | H | 1.0862109 | 117.0904949 | -141.2525642 | 3.1662626  | 4.9589125  | 2.4355477  |
| 74 | H | 0.9809217 | 111.8629175 | 0.5691838    | -7.9237845 | -1.0924835 | 0.6253469  |
| 75 | H | 0.9809673 | 70.4585414  | 170.2503309  | -4.7303695 | -0.4250522 | 3.8120716  |
| 76 | H | 1.0856711 | 119.672557  | -179.3918078 | 7.3653718  | -4.4022841 | -2.0565412 |
| 77 | H | 1.0837747 | 123.5589821 | -1.4931815   | 7.2653273  | -2.5581124 | -2.0250024 |
| 78 | H | 1.085427  | 119.8037872 | 179.5169719  | 3.5619869  | 7.2279125  | 1.7364472  |
| 79 | H | 1.0840543 | 123.0185292 | 1.2788611    | 2.3188557  | 7.0848528  | 0.3720576  |

---

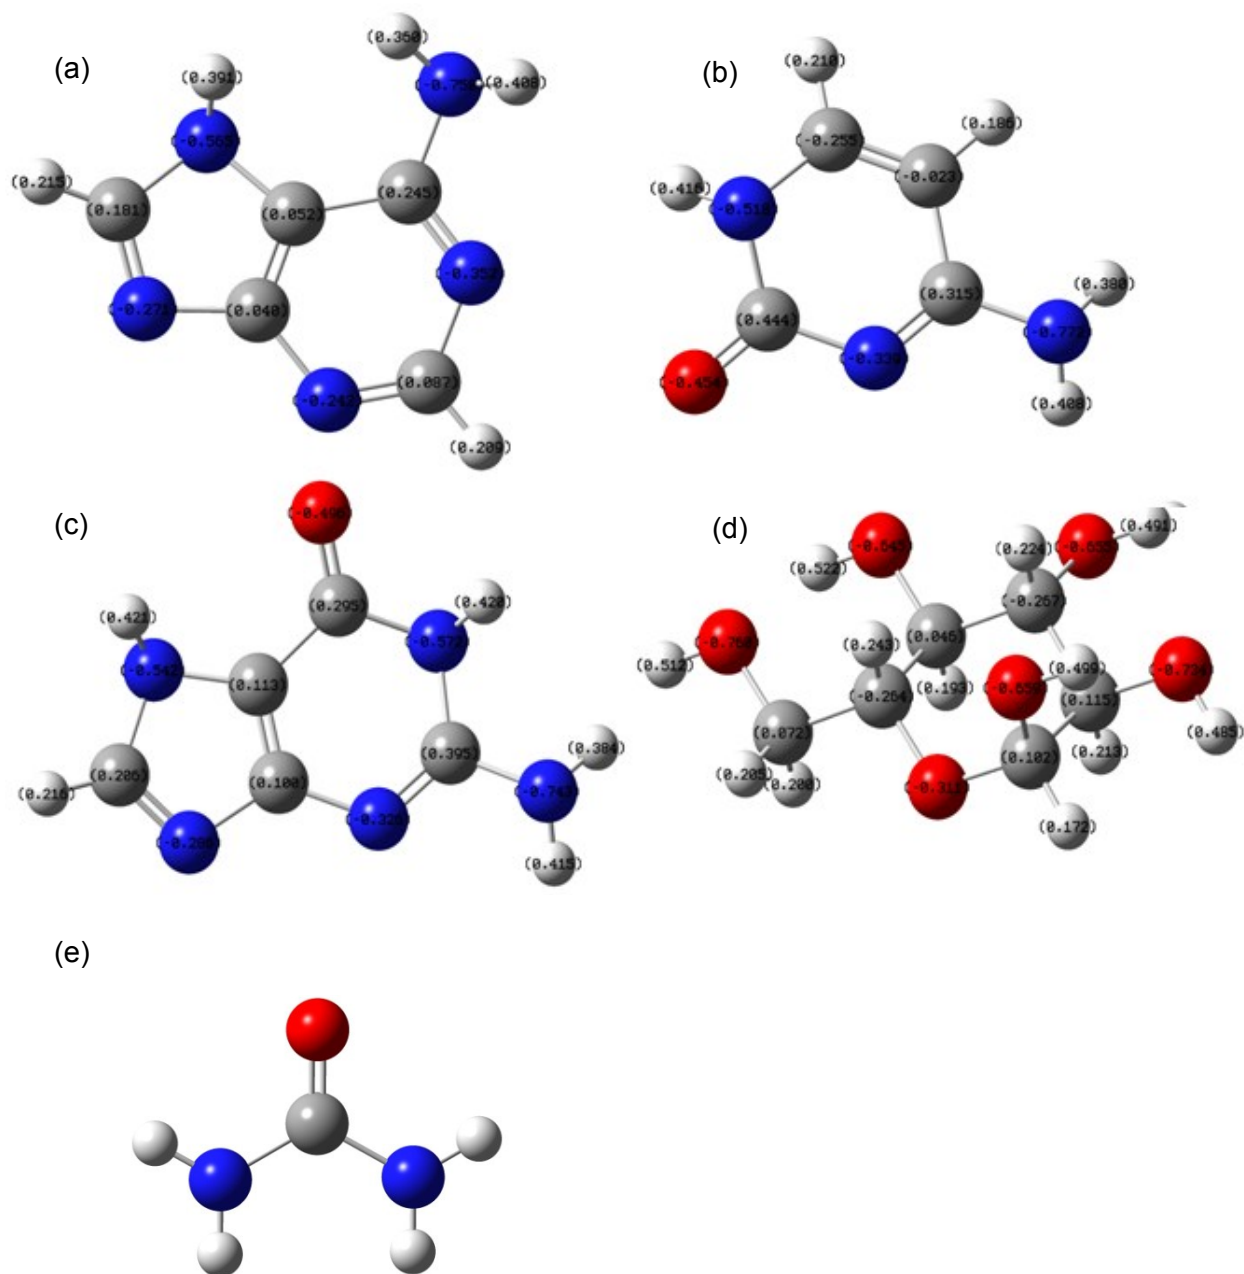

**Fig. S3.** Optimized structure of (a) adenine, (b) cytosine, (c) guanine, (d) glucose and (e) urea in the present study obtained from density functional theory (DFT) using B3LYP method and 6-31+G (d) basis set

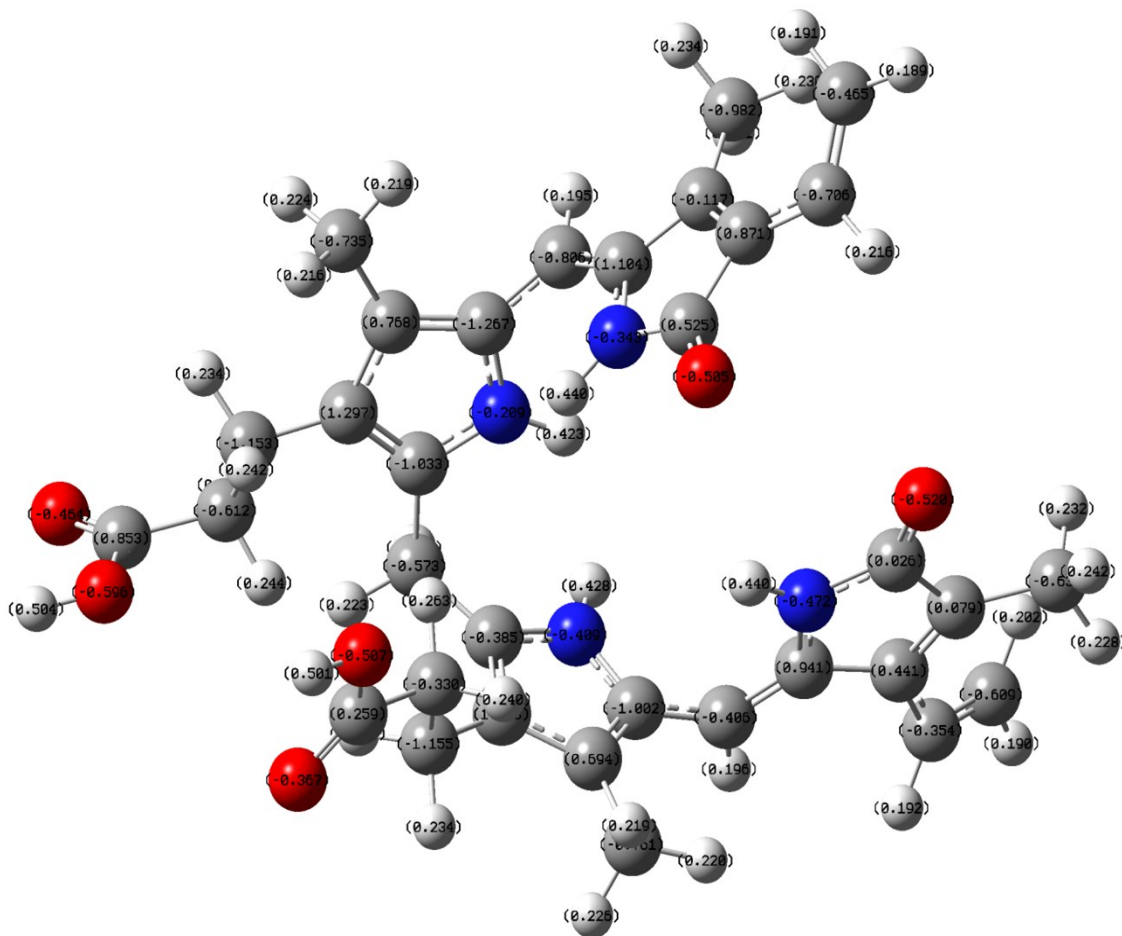

**Fig. S4.** Optimized structure of bilirubin taken in the present study obtained from density functional theory (DFT) using B3LYP method and 6-31+G (d) basis set.

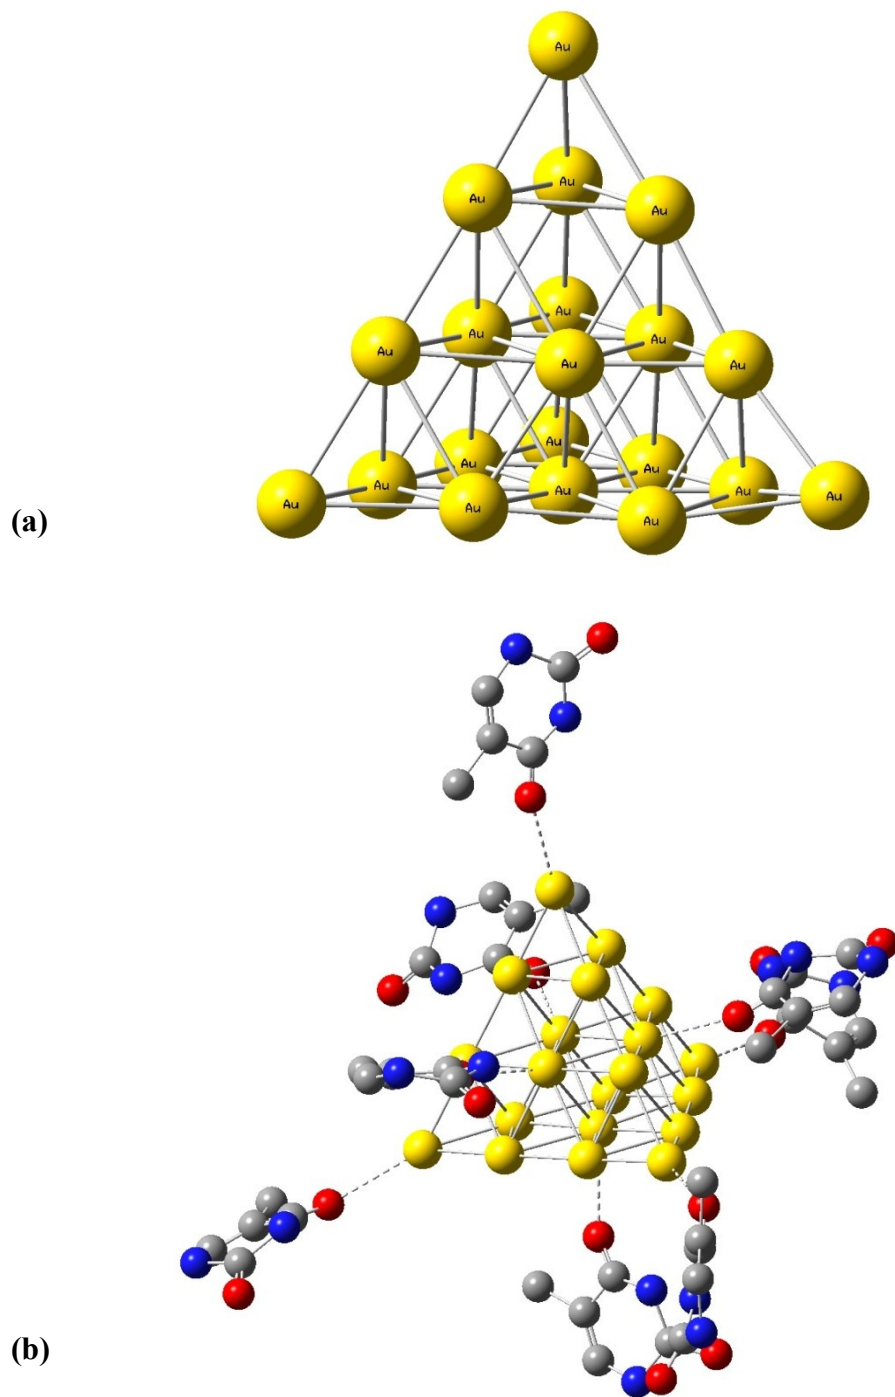

**Fig. S5.** (a) Optimized omnicauded truncated tetrahedral ( $v_3$ -tetrahedral) Au<sub>20</sub> cluster structure model (b) Omnicauded truncated tetrahedral ( $v_3$ -tetrahedral) Au<sub>20</sub> cluster interacted with thymine (hydrogen is not shown for clarity)-In both structure optimization is done using B3LYP method and LANL2DZ basis set.

**Table S9.** The Cartesian coordinates gold nanoparticles (Au<sub>20</sub>) interacted with thymine calculated by density functional theory (DFT) using B3LYP method and LANL2DZ basis set (E= -2709.74444741 a.u.)

| Row | Symbol | X         | Y         | Z         |
|-----|--------|-----------|-----------|-----------|
| 1   | O      | 4.810618  | 3.537719  | -4.924586 |
| 2   | O      | 8.316747  | 0.961335  | -6.577398 |
| 3   | N      | 6.222534  | 1.95086   | -6.079545 |
| 4   | N      | 8.290459  | 3.318847  | -6.855543 |
| 5   | C      | 6.655086  | 4.441377  | -5.450655 |
| 6   | C      | 5.824802  | 3.233678  | -5.482918 |
| 7   | C      | 7.841743  | 4.461535  | -6.023578 |
| 8   | C      | 6.006248  | 5.62131   | -4.671069 |
| 9   | C      | 7.640775  | 2.021604  | -6.494772 |
| 10  | H      | 8.467856  | 5.311499  | -5.885601 |
| 11  | H      | 6.081425  | 1.197684  | -5.418016 |
| 12  | H      | 9.270955  | 3.229633  | -6.735026 |
| 13  | H      | 6.097333  | 5.452023  | -3.612665 |
| 14  | H      | 4.961983  | 5.677737  | -4.925785 |
| 15  | H      | 6.484977  | 6.534722  | -4.92723  |
| 16  | Au     | 2.903248  | 2.018234  | -3.330425 |
| 17  | Au     | 1.466701  | 2.451638  | -1.161162 |
| 18  | Au     | 2.675081  | 0.101921  | -1.508523 |
| 19  | Au     | 0.585919  | 0.699241  | -3.034324 |
| 20  | Au     | -0.872774 | 1.191972  | -0.852271 |
| 21  | Au     | -1.832283 | -0.574708 | -2.619568 |
| 22  | Au     | 1.263995  | 0.565809  | 0.734928  |
| 23  | Au     | 0.013862  | 2.909393  | 1.029438  |
| 24  | Au     | 0.386701  | -1.228208 | -1.135847 |
| 25  | Au     | 2.507086  | -1.772325 | 0.428674  |
| 26  | Au     | -3.242538 | -0.128191 | -0.402021 |
| 27  | Au     | -1.947485 | -2.468848 | -0.762071 |
| 28  | Au     | -4.147012 | -1.927184 | -2.127844 |
| 29  | Au     | -2.325328 | 1.71699   | 1.333639  |
| 30  | Au     | -1.124403 | -0.730734 | 1.095474  |
| 31  | Au     | -1.436877 | 3.444266  | 3.181663  |
| 32  | Au     | -0.301936 | 1.047112  | 2.909311  |
| 33  | Au     | 0.189286  | -3.055201 | 0.847076  |
| 34  | Au     | 1.049138  | -1.281543 | 2.6206    |
| 35  | Au     | 2.334243  | -3.58776  | 2.35016   |
| 36  | O      | -1.595824 | 5.711704  | 4.988584  |
| 37  | O      | -4.943652 | 8.680295  | 5.793803  |
| 38  | N      | -3.749424 | 6.663989  | 5.470394  |
| 39  | N      | -3.249297 | 8.32037   | 7.420174  |

|    |   |           |           |           |
|----|---|-----------|-----------|-----------|
| 40 | C | -1.426274 | 6.947332  | 6.613034  |
| 41 | C | -2.332715 | 6.378346  | 5.606813  |
| 42 | C | -1.820812 | 7.927923  | 7.38727   |
| 43 | C | -0.000931 | 6.302987  | 6.632355  |
| 44 | C | -4.022591 | 7.924197  | 6.198385  |
| 45 | H | -1.100586 | 8.430192  | 7.99049   |
| 46 | H | -3.990871 | 6.759696  | 4.494841  |
| 47 | H | -3.279622 | 9.308502  | 7.513672  |
| 48 | H | 0.559156  | 6.627148  | 5.775105  |
| 49 | H | -0.097079 | 5.229364  | 6.599635  |
| 50 | H | 0.513333  | 6.584271  | 7.520837  |
| 51 | O | 3.926821  | -5.662018 | 3.58698   |
| 52 | O | 8.507361  | -5.399546 | 4.00749   |
| 53 | N | 6.200398  | -4.823123 | 4.074329  |
| 54 | N | 7.232478  | -6.757552 | 5.483736  |
| 55 | C | 4.887824  | -6.903604 | 4.883757  |
| 56 | C | 5.007455  | -5.689349 | 4.123873  |
| 57 | C | 5.935528  | -7.476416 | 5.419564  |
| 58 | C | 3.419903  | -7.408345 | 4.930052  |
| 59 | C | 7.366762  | -5.646128 | 4.488502  |
| 60 | H | 5.835539  | -8.459918 | 5.807214  |
| 61 | H | 6.343502  | -4.462499 | 3.14338   |
| 62 | H | 7.949075  | -7.426451 | 5.317771  |
| 63 | H | 3.13705   | -7.785816 | 3.966097  |
| 64 | H | 2.770924  | -6.582203 | 5.18407   |
| 65 | H | 3.320524  | -8.171852 | 5.659053  |
| 66 | O | -9.756123 | -2.748057 | -5.79834  |
| 67 | O | -6.627426 | -3.434006 | -2.699268 |
| 68 | N | -8.168477 | -2.298737 | -4.097458 |
| 69 | N | -8.695947 | -3.46656  | -1.874793 |
| 70 | C | -10.29429 | -3.761114 | -3.668119 |
| 71 | C | -9.415081 | -2.900947 | -4.597366 |
| 72 | C | -9.879877 | -4.079323 | -2.429444 |
| 73 | C | -11.64784 | -4.276763 | -4.159244 |
| 74 | C | -7.762931 | -3.058173 | -2.92253  |
| 75 | H | -10.41972 | -4.787613 | -1.836674 |
| 76 | H | -7.469715 | -2.356799 | -4.812859 |
| 77 | H | -8.248674 | -4.130153 | -1.282746 |
| 78 | H | -11.49666 | -5.054164 | -4.87679  |
| 79 | H | -12.18551 | -3.470684 | -4.610037 |
| 80 | H | -12.20553 | -4.66027  | -3.329751 |
| 81 | O | -3.317725 | -1.768648 | 2.701772  |
| 82 | O | -3.137848 | -5.238612 | 5.617666  |
| 83 | N | -2.678769 | -3.18922  | 4.533318  |



|     |   |           |           |           |
|-----|---|-----------|-----------|-----------|
| 84  | N | -4.925606 | -3.677696 | 5.755421  |
| 85  | C | -4.958533 | -2.094307 | 3.918312  |
| 86  | C | -3.530687 | -2.356744 | 3.701544  |
| 87  | C | -5.635385 | -2.792896 | 4.799583  |
| 88  | C | -5.553564 | -0.976602 | 3.00189   |
| 89  | C | -3.556802 | -4.092571 | 5.308316  |
| 90  | H | -6.697437 | -2.710834 | 4.815613  |
| 91  | H | -2.048334 | -3.722466 | 3.954663  |
| 92  | H | -5.484266 | -4.490575 | 5.873809  |
| 93  | H | -5.645983 | -1.341452 | 1.996264  |
| 94  | H | -4.89119  | -0.125459 | 3.004235  |
| 95  | H | -6.509907 | -0.679951 | 3.362949  |
| 96  | O | -1.485863 | 3.375218  | -2.600702 |
| 97  | O | -5.334385 | 4.596087  | -4.534321 |
| 98  | N | -3.695103 | 4.108095  | -2.923512 |
| 99  | N | -3.393387 | 5.963003  | -4.722205 |
| 100 | C | -1.397405 | 4.904078  | -3.883128 |
| 101 | C | -2.267689 | 4.055705  | -3.046887 |
| 102 | C | -1.930284 | 5.722458  | -4.744966 |
| 103 | C | 0.152295  | 4.69924   | -3.670631 |
| 104 | C | -4.195173 | 4.865209  | -4.081256 |
| 105 | H | -1.299518 | 6.207612  | -5.45444  |
| 106 | H | -4.072553 | 3.173068  | -2.908513 |
| 107 | H | -3.684638 | 6.060772  | -5.66354  |
| 108 | H | 0.462362  | 3.768256  | -4.111208 |
| 109 | H | 0.370679  | 4.672457  | -2.614884 |
| 110 | H | 0.692064  | 5.500955  | -4.120862 |
| 111 | O | 1.560876  | -3.372945 | -2.685493 |
| 112 | O | 2.908628  | -3.050632 | -7.01468  |
| 113 | N | 2.729263  | -2.627314 | -4.692626 |
| 114 | N | 3.643491  | -4.866633 | -5.670178 |
| 115 | C | 2.633072  | -4.915255 | -3.471016 |
| 116 | C | 2.28102   | -3.51202  | -3.622002 |
| 117 | C | 3.148018  | -5.582817 | -4.469944 |
| 118 | C | 2.292598  | -5.491109 | -2.060617 |
| 119 | C | 3.077673  | -3.489126 | -5.846832 |
| 120 | H | 3.206648  | -6.641464 | -4.400752 |
| 121 | H | 2.004232  | -1.978888 | -4.943261 |
| 122 | H | 3.399977  | -5.417905 | -6.461071 |
| 123 | H | 1.22969   | -5.46618  | -1.912231 |
| 124 | H | 2.763013  | -4.885721 | -1.30114  |
| 125 | H | 2.645813  | -6.49072  | -1.979208 |
| 126 | O | 3.597331  | 0.98722   | 2.413545  |
| 127 | O | 6.707512  | 4.059927  | 1.325842  |

|     |   |          |           |          |
|-----|---|----------|-----------|----------|
| 128 | N | 4.673291 | 3.017655  | 1.890551 |
| 129 | N | 6.675422 | 3.185661  | 3.535216 |
| 130 | C | 5.150172 | 1.310783  | 3.802157 |
| 131 | C | 4.401907 | 1.803381  | 2.624358 |
| 132 | C | 6.275053 | 1.898424  | 4.155548 |
| 133 | C | 4.531042 | 0.070614  | 4.526528 |
| 134 | C | 6.048268 | 3.44375   | 2.201566 |
| 135 | H | 6.889881 | 1.437058  | 4.894195 |
| 136 | H | 4.571782 | 2.843516  | 0.902234 |
| 137 | H | 7.662308 | 3.166524  | 3.425442 |
| 138 | H | 4.67987  | -0.811148 | 3.931974 |
| 139 | H | 3.473739 | 0.227709  | 4.659336 |
| 140 | H | 4.990848 | -0.061018 | 5.478918 |

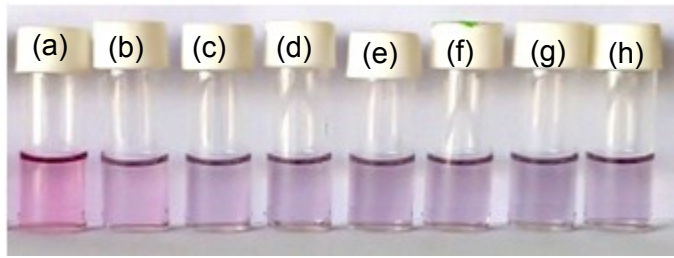

**Fig. S6.** Glass vial containing different dilution of hydrolyzed product of DNA standard sample and AuNPs that could be differentiated by naked eyes for qualitative determination of thymine

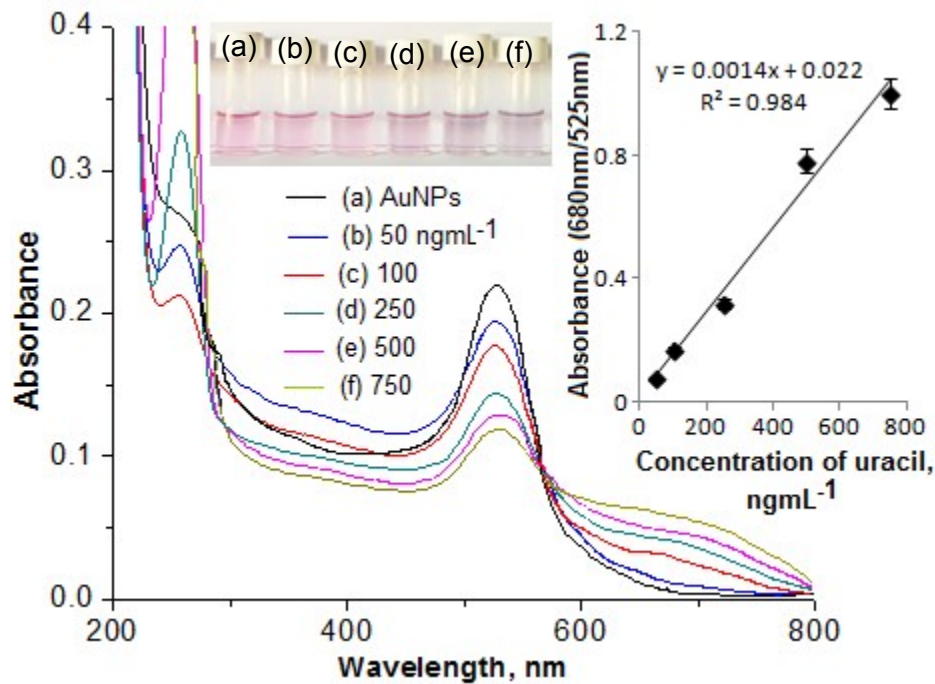

**Fig. S7.** Glass vial containing AuNPs along with different concentration of uracil (50, 100, 250, 500, 750 ngmL<sup>-1</sup>) with their respective UV-Vis spectra and inserted graph showing the calibration curve obtained with different concentration of uracil and absorbance ratio (680 nm/525 nm)
